# Supplementary material
Source: PubMed Central journal article supplement (PMC4023751)
Supplement: AAC.01958-13_zac004142709so1.pdf [file AAC.01958-13_zac004142709so1.pdf]

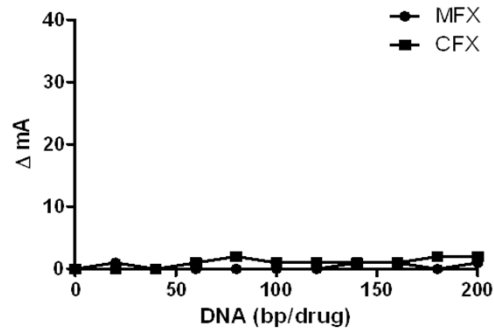

**FIG S3.** Interaction of CFX and MFX with DNA monitored by fluorescence anisotropy. 10 nM of MFX or CFX was titrated with salmon sperm DNA (bp/drug molecule).

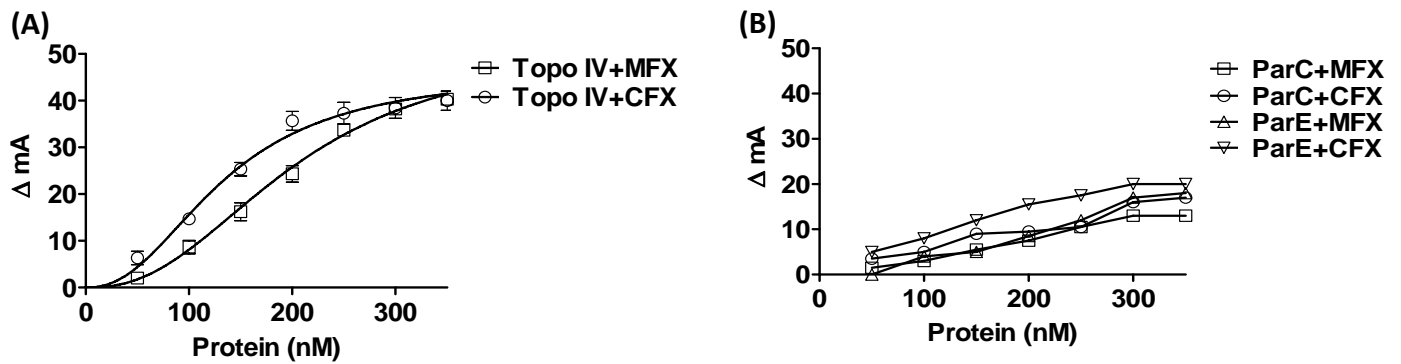

**FIG S4.** Interaction of CFX and MFX with *E. coli* topoisomerase IV and its individual subunits. 10 nM of CFX or MFX was titrated with varying concentrations of **(A)** topoisomerase IV holoenzyme and **(B)** individual subunits, ParC and ParE.

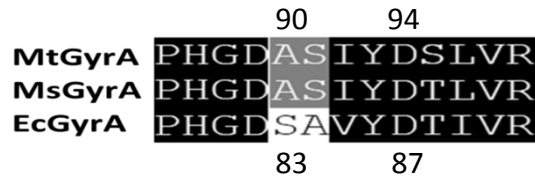

**FIG S5.** Alignment of the amino acid residues from *M. tuberculosis* (Mt), *M. smegmatis* (Ms) and *E. coli* (Ec) GyrA. The serine 83 and aspartate 87 in *E. coli* GyrA correspond to alanine 90 and aspartate 94 in GyrA of *M. tuberculosis* and *M. smegmatis*.

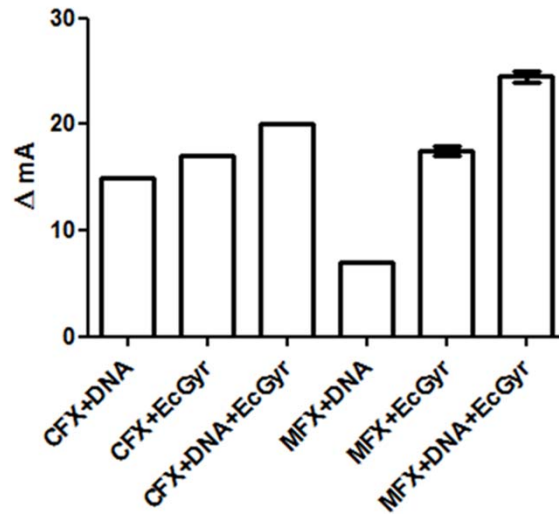

**FIG S6.** Interaction of FQs with DNA, *E. coli* gyrase (EcGyr) and the EcGyr-DNA complex at lower salt concentration. 20 nM of the FQ was incubated with salmon sperm DNA (200 bp/FQ) or 20 nM of the enzyme or pre-incubated enzyme-DNA complex in the presence of binding buffer containing 25 mM KCl.

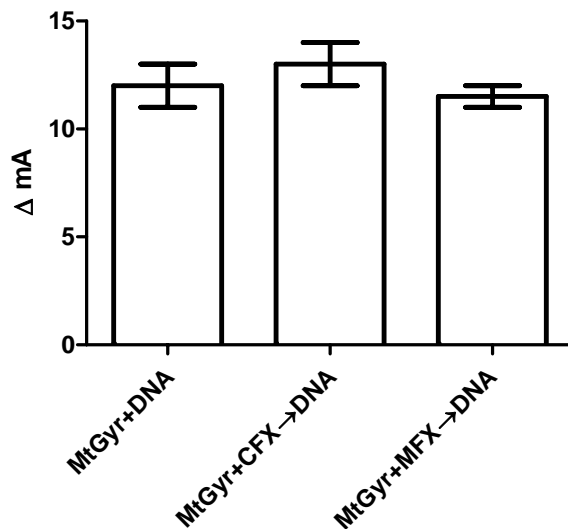

**FIG S7.** Effect of FQs on gyrase-DNA interaction. 250 nM of *M. tuberculosis* DNA gyrase (MtGyr) was pre incubated with 2.5 μM of CFX or MFX on ice for 10 min. The anisotropy measurements were carried out after addition of pre-formed enzyme-drug complex or enzyme alone to 10 nM of fluorescein (Ex/Em-492/514) labeled 72 bp DNA.

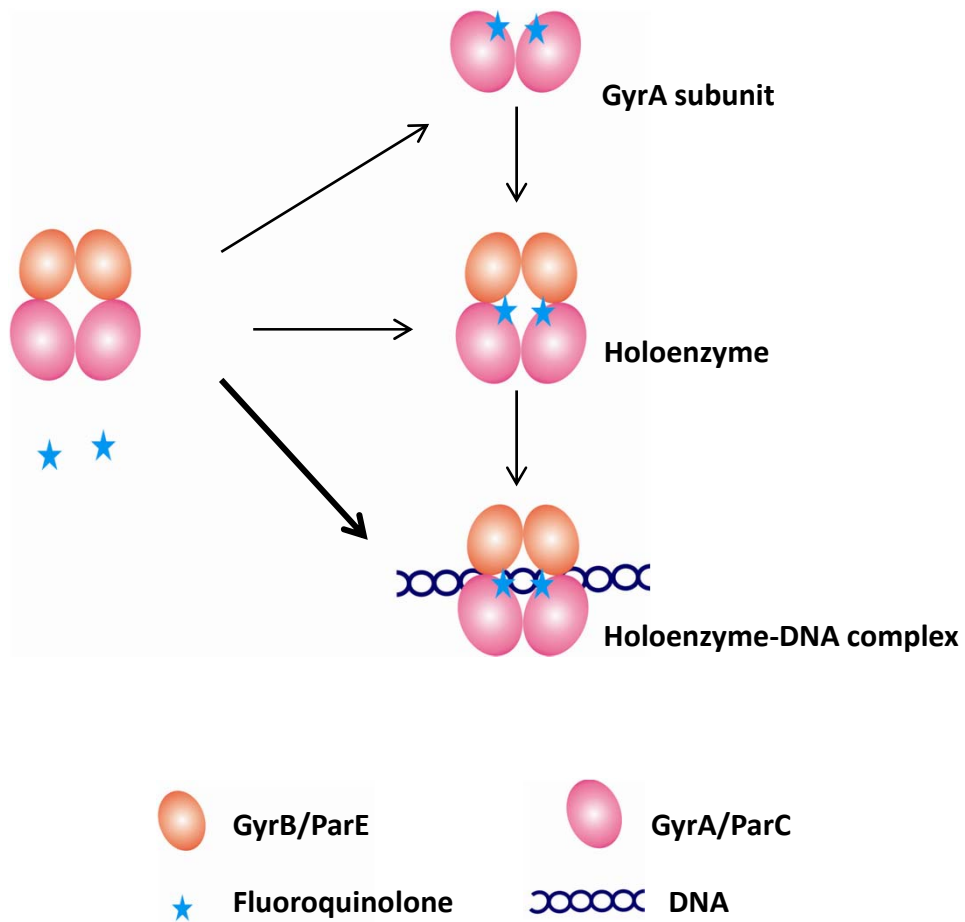

**FIG S8.** Different modes of FQ binding to the type IIA topoisomerase. The FQs bind to the gyrase/topo IV –DNA complex. Alternatively, the FQs bind to holoenzyme (*E. coli* and mycobacteria) in the absence of DNA. The FQs may bind to the GyrA subunit alone (mycobacteria) that may form a holoenzyme followed by DNA binding. Among the different modes shown, the binding to holoenzyme-DNA complex appears to be the most preferred (Shown by bold arrow).

|                   |                                                                                 |
|-------------------|---------------------------------------------------------------------------------|
| <b>G-Factor</b>   | Value representing the polarization characteristics of the diffraction grating  |
|                   | $G=i_{90}/i_0$                                                                  |
| <b>Anisotropy</b> | Degree of fluorescence polarization                                             |
|                   | $A=i_0-i_{90}XG/i_0+2Xi_{90}XG$                                                 |
| <b>I0</b>         | Fluorescence intensity measured with excitation and emission polarizers at 0 °  |
| <b>I90</b>        | Fluorescence intensity measured with excitation and emission polarizers at 90 ° |

**TABLE S1.** The terminologies and equations used in the calculation of fluorescence anisotropy.
